# Supplementary material
Source: Springer Nature journal article supplement (https://www.springerprofessional.de/resource/supplementary/13638_2013_1075_MOESM12_ESM.pdf/11899024)

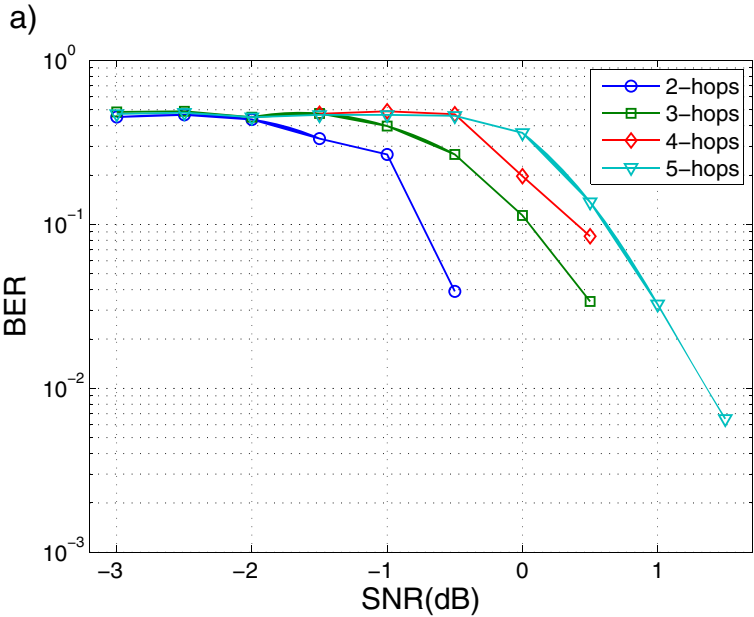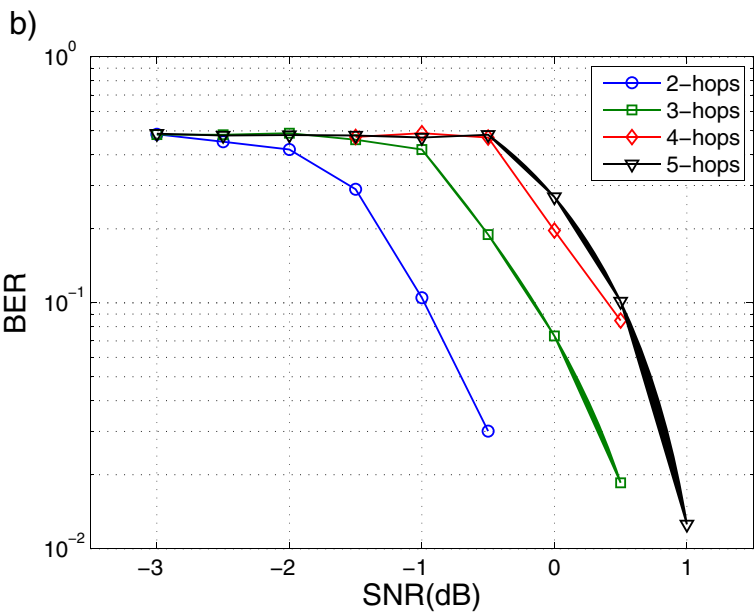

Supplement: MOESM12 [file 11899024]
